# Supplementary material
Source: HighWire-hosted journal article supplement (https://cmajopen.ca/highwire/filestream/85470/field_highwire_adjunct_files/0/2020-0099-1-at.pdf)
Supplement: 2020-0099-1-at.pdf [file 2020-0099-1-at.pdf]

## Ovid Multi-Database Search

EBM Reviews - Cochrane Central Register of Controlled Trials September 2020, Embase 1974 to 2020  
October 19, Ovid MEDLINE(R) ALL 1946 to October 19, 2020

|    |                                                                                                                                                                                                                                                                                                                                       |         |
|----|---------------------------------------------------------------------------------------------------------------------------------------------------------------------------------------------------------------------------------------------------------------------------------------------------------------------------------------|---------|
| 1  | exp Pregnancy/ or Pregnant Women/ or exp "Hypertension, Pregnancy-Induced"/ or maternal hypertension/ or exp "eclampsia and preeclampsia"/ or HELLP syndrome/                                                                                                                                                                         | 1655951 |
| 2  | exp "Pregnancy Complications, Cardiovascular"/ or exp pregnancy complication/                                                                                                                                                                                                                                                         | 564190  |
| 3  | Prenatal Care/ or Prenatal Diagnosis/                                                                                                                                                                                                                                                                                                 | 162484  |
| 4  | ((pregnant or pregnancy or maternal or gestation* or prenatal or pre-natal or antenatal or ante-natal or prepartum or pre-partum or antepartum or ante-partum or prepartal or pre-partal or antepartal or ante-partal) adj3 (hypertens* or hypertens*)) or eclamp* or preeclamp* or pre-eclamp* or HDP or HDPs or HELLP).ti,ab,kf,kw. | 121977  |
| 5  | ((pregnant or pregnancy or maternal or gestation* or prenatal or pre-natal or antenatal or ante-natal or prepartum or pre-partum or antepartum or ante-partum or prepartal or pre-partal or antepartal or ante-partal) adj3 complication*).ti,ab,kf,kw.                                                                               | 67771   |
| 6  | or/1-5 [PREGNANCY]                                                                                                                                                                                                                                                                                                                    | 1799510 |
| 7  | exp Blood Pressure Determination/ or blood pressure cuff/ or blood pressure monitor/ or exp blood pressure measurement/                                                                                                                                                                                                               | 147012  |
| 8  | (((((blood or arterial or pulse or vascular) adj3 (pressure* or tension*)) or BP) adj3 (monitor* or measur* or determin* or record* or assess* or telemonitor*)).ti,ab,kf,kw.                                                                                                                                                         | 183333  |
| 9  | Blood Pressure/ and (telemonitoring/ or (monitor* or measur* or determin* or record* or assess* or telemonitor*).ti,ab,kf,kw.)                                                                                                                                                                                                        | 269347  |
| 10 | or/7-9 [BP MONITORING]                                                                                                                                                                                                                                                                                                                | 466782  |
| 11 | Self Care/ or Self Administration/ or self monitoring/ or home monitoring/ or Patient Participation/                                                                                                                                                                                                                                  | 184198  |
| 12 | patient attitude/                                                                                                                                                                                                                                                                                                                     | 68607   |
| 13 | (self or selfcare or home or homecare or homebased).ti,ab,kf,kw.                                                                                                                                                                                                                                                                      | 2346849 |

|    |                                                                                                                                     |          |
|----|-------------------------------------------------------------------------------------------------------------------------------------|----------|
| 14 | (patient adj3 (participation or involvement or empowerment or activation or engagement or attitude*)).ti,ab,kf,kw.                  | 53533    |
| 15 | or/11-14 [HOME/SELF]                                                                                                                | 2512748  |
| 16 | 6 and 10 and 15 [PREGNANCY + BP MONITORING + (HOME OR SELF)]                                                                        | 1016     |
| 17 | Blood Pressure/ or Hypertension/                                                                                                    | 1234208  |
| 18 | (hypertens* or hyper-tens* or normotens* or normo-tens* or BP).ti,ab,kf,kw.                                                         | 1511920  |
| 19 | 17 or 18                                                                                                                            | 2084170  |
| 20 | (HBPM or SBPM).ti,ab,kf,kw.                                                                                                         | 1107     |
| 21 | (15 and 19) or 20 [BP HOME OR SELF MONITORING]                                                                                      | 73343    |
| 22 | 6 and 21 [PREGNANCY + BP HOME OR SELF MONITORING]                                                                                   | 3257     |
| 23 | 16 or 22 [PREGNANCY + HBPM]                                                                                                         | 3393     |
| 24 | limit 23 to english language                                                                                                        | 3145     |
| 25 | (editorial or comment or letter or "newspaper article" or news or note or lecture).pt.                                              | 4749833  |
| 26 | 24 not 25                                                                                                                           | 3104     |
| 27 | ("conference abstract" or "conference review").pt.                                                                                  | 3915816  |
| 28 | 26 not 27                                                                                                                           | 2188     |
| 29 | (Animals/ or "Animal Experimentation"/ or "Models, Animal"/ or "Disease Models, Animal"/) not (Humans/ or "Human Experimentation"/) | 8224318  |
| 30 | (exp "animal model"/ or exp "animal experiment"/ or "nonhuman"/ or exp "vertebrate"/) not exp "human"/                              | 10250744 |
| 31 | 28 not (29 or 30)                                                                                                                   | 2172     |
|    | <u>EBM Reviews - Cochrane Central Register of Controlled Trials &lt;September 2020&gt;</u>                                          | 131      |
|    | <u>Embase &lt;1974 to 2020 October 19&gt;</u>                                                                                       | 1172     |
|    | <u>Ovid MEDLINE(R) ALL &lt;1946 to October 19, 2020&gt;</u>                                                                         | 869      |
| 32 | remove duplicates from 31                                                                                                           | 1401     |
|    | <u>EBM Reviews - Cochrane Central Register of Controlled Trials &lt;September 2020&gt;</u>                                          | 52       |
|    | <u>Embase &lt;1974 to 2020 October 19&gt;</u>                                                                                       | 481      |
|    | <u>Ovid MEDLINE(R) ALL &lt;1946 to October 19, 2020&gt;</u>                                                                         | 868      |
